# Supplementary material for: Idiopathic Infertility as a Feature of Genome Instability
Source: MDPI journal article supplement (doi:10.3390/life11070628), 2021-06-29
Supplement: s1 [file s1]

## Supplementary Materials:

Review

# Idiopathic Infertility as a Feature of Genome Instability

Agrita Puzuka <sup>1,2</sup>, Baiba Alksere <sup>1,3</sup>, Linda Gailite <sup>1</sup> and Juris Erenpreiss <sup>1,3,\*</sup>

**Table 1.** The association of single-gene allelic variants with male infertility. Table 1 summarizes the latter data, including the normal function and pathological dysfunction of these genes. Genes included in the table are summarized from literature sources that were used to write this review article, the pathology name and gene functions defined using information from UniProt database <https://www.uniprot.org/>

| Gene          | Full name                                 | Function                                                                                                                                                         | Pathology                                        |
|---------------|-------------------------------------------|------------------------------------------------------------------------------------------------------------------------------------------------------------------|--------------------------------------------------|
| <i>AK7</i>    | Adenylate kinase 7                        | Nucleoside monophosphate (NMP) kinase that catalyzes the reversible transfer of the terminal phosphate group between nucleoside triphosphates and monophosphates | Multiple morphological anomalies of the flagella |
| <i>AKAP3</i>  | A-Kinase anchor protein 3                 | Regulator of both motility- and head-associated functions such as capacitation and the acrosome reaction                                                         | Multiple morphological anomalies of the flagella |
| <i>AKAP4</i>  | A-Kinase anchor protein 4                 | Regulator of both motility- and head-associated functions such as capacitation and the acrosome reaction                                                         | Multiple morphological anomalies of the flagella |
| <i>AR</i>     | Androgen receptor                         | Steroid hormone receptor                                                                                                                                         | Azoospermia                                      |
| <i>AURKC</i>  | Aurora kinase C                           | Serine/threonine-protein kinase component of the chromosomal passenger complex (CPC), a complex that acts as a key regulator of mitosis                          | Macrozoospermia                                  |
| <i>BDNF</i>   | Brain-derived neurotrophic factor         | Influences viability, motility, nitric oxide concentration, mitochondrial activity and lipid peroxidation content                                                | Oligo-asthenoteratozoospermia                    |
| <i>CDKN1C</i> | Cyclin-dependent kinase inhibitor 1C      | Negative regulator of cell proliferation                                                                                                                         | Foetal growth restriction                        |
| <i>CEP135</i> | Centrosomal protein of 135 kDa            | Microtubule binding                                                                                                                                              | Multiple morphological anomalies of the flagella |
| <i>CFAP43</i> | Cilia- and flagella-associated protein 43 | Sperm flagellar formation                                                                                                                                        | Multiple morphological anomalies of the flagella |
| <i>CFAP44</i> | Cilia- and flagella-associated protein 44 | Sperm flagellar formation                                                                                                                                        | Multiple morphological anomalies of the flagella |
| <i>CFAP69</i> | Cilia- and flagella-associated protein 69 | Sperm flagellar formation                                                                                                                                        | Multiple morphological anomalies of the flagella |

|                 |                                                                                        |                                                                                   |                                                  |
|-----------------|----------------------------------------------------------------------------------------|-----------------------------------------------------------------------------------|--------------------------------------------------|
| <i>CFTR</i>     | Cystic fibrosis transmembrane conductance regulator                                    | Vas deferens formation, reduced sperm quality                                     | Congenital bilateral absence of the vas deferens |
| <i>DCN</i>      | Decorin                                                                                | Dysfunctional spermatogenesis and spermiogenesis                                  | Azoospermia, foetal growth restriction           |
| <i>DLK1</i>     | Delta-like non-canonical Notch ligand 1                                                | Inhibits adipocyte differentiation                                                | Foetal growth restriction                        |
| <i>DMC1</i>     | DMC1                                                                                   | DNA repair                                                                        | Azoospermia, oligozoospermia                     |
| <i>DNAH1</i>    | Dynein heavy chain 1, axonemal                                                         | Sperm flagellum motility                                                          | Multiple morphological anomalies of the flagella |
| <i>DNMT1</i>    | DNA (cytosine-5)-methyltransferase 1                                                   | Methylation of newly formed DNA strands                                           | Oligo-asthenoteratozoospermia                    |
| <i>DPY19L2</i>  | Dpy-19-like 2                                                                          | Attaches acrosome to the nuclear membrane                                         | Globozoospermia                                  |
| <i>GNAS</i>     | Guanine nucleotide-binding protein (G protein), alpha-stimulating activity polypeptide | Endocrinal regulation                                                             | Oligozoospermia, hypogonadism                    |
| <i>GRB10</i>    | Growth factor receptor-bound protein 10                                                | Embryonic development                                                             | Foetal growth restriction                        |
| <i>H19</i>      | Maternally inherited long non-coding RNA                                               | Embryonic development                                                             | Foetal growth restriction                        |
| <i>Igf2</i>     | Insulin-like growth factor 2                                                           | Regulation of cell proliferation, growth, migration, differentiation and survival | Foetal growth retardation, OAT, teratozoospermia |
| <i>MAPK8IP3</i> | Mitogen-activated protein kinase 8-interacting protein 3                               | Kinesin-1 transportation                                                          | Azoospermia, oligozoospermia                     |
| <i>MEST</i>     | Mesoderm-specific transcript                                                           | Mesoderm development                                                              | Azoospermia, oligozoospermia                     |
| <i>MLH1</i>     | MutL homolog 1                                                                         | MMR                                                                               | Azoospermia, oligozoospermia                     |
| <i>MLH3</i>     | MutL homolog 3                                                                         | MMR                                                                               | Azoospermia, oligozoospermia                     |
| <i>P16</i>      | Cyclin-dependent kinase inhibitor 2A                                                   | Cell cycle regulation                                                             | Oligoasthenozoospermia                           |
| <i>PGAM5</i>    | PGAM family member 5                                                                   | Mitochondrial function                                                            | Varicocele                                       |
| <i>POMC</i>     | Pro-opiomelanocortin                                                                   | Opioid system regulation                                                          | Oligozoospermia, teratozoospermia                |
| <i>PRDM9</i>    | PR domain zinc finger protein 9                                                        | Regulating DSB positions                                                          | Azoospermia                                      |
| <i>PTPRN2</i>   | Receptor-type tyrosine-                                                                | Regulatory component in signal transduction pathway                               | Azoospermia,                                     |

|               |                                                                   |                                                                                   |                                                   |
|---------------|-------------------------------------------------------------------|-----------------------------------------------------------------------------------|---------------------------------------------------|
|               | protein phosphatase N2                                            |                                                                                   | oligozoospermia                                   |
| <i>RAD51</i>  | RAD51 recombinase                                                 | DSB repair                                                                        | Azoospermia,<br>oligozoospermia                   |
| <i>RASGRF</i> | RAS protein-specific<br>guanine nucleotide-<br>releasing factor 2 | Stimulates the conversion of the GDP-bound form<br>into the active form           | Globozoospermia and lack<br>of acrosome formation |
| <i>Rec8</i>   | Meiotic recombination<br>protein REC8 homolog                     | Chromosome segregation at meiosis, cohesin subunit                                | Azoospermia                                       |
| <i>Set1</i>   | Histone-lysine N-<br>methyltransferase                            | Histone H3-K4 methylation                                                         | Diminished DSB formation                          |
| <i>SGCE</i>   | Sarcoglycan, epsilon                                              | Subunit of sarcoglycan protein complex                                            | Foetal growth restriction                         |
| <i>SNRPN</i>  | Small nuclear<br>ribonucleoprotein-<br>associated protein N       | Paternal imprinting                                                               | Foetal growth restriction                         |
| <i>SPO11</i>  | Meiotic recombination<br>protein SPO11                            | Meiotic recombination                                                             | Azoospermia,<br>oligozoospermia                   |
| <i>TEX11</i>  | Testis-expressed protein<br>11                                    | Promotes initiation and/or maintenance of synapsis<br>and formation of crossovers | Spermatogenic failure                             |
| <i>TEX15</i>  | Testis-expressed protein<br>15                                    | Promotes initiation and/or maintenance of synapsis<br>and formation of crossovers | Spermatogenic failure                             |
| <i>TKR</i>    | Transketolase-like 1                                              | Testis-specific expression                                                        | Spermatogenic failure                             |
| <i>TYRO3</i>  | Protein tyrosine kinase 3                                         | Germ cell development                                                             | Spermatogenic failure                             |
